# Supplementary material for: Increased attrition of memory T cells during sepsis requires 2B4
Source: JCI journal article supplement (doi:10.1172/jci.insight.126030), 2019-05-01
Supplement: sd1 [file 1]

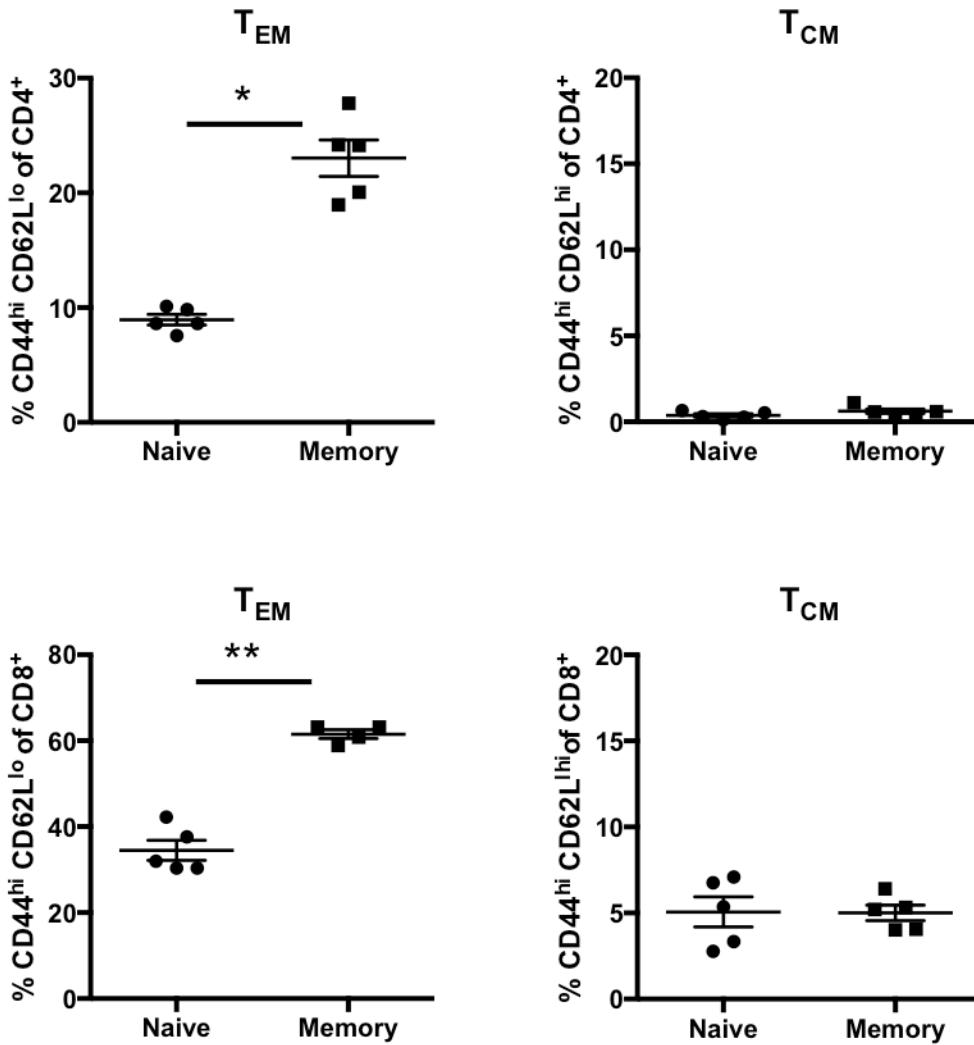

**Supplemental Figure Legend 1. Frequencies of central vs. effector memory T cells in “memory mice” at day 60 post-infection.** Naive B6 mice were infected with *Listeria* and allowed to develop a population of memory T cells. 30 days later, mice were infected with LCMV. 30 days after LCMV infection, establishment of memory was assessed by flow cytometry. Frequencies of CD44<sup>hi</sup> CD62<sup>lo</sup> effector memory cells (T<sub>EM</sub>) relative to CD44<sup>hi</sup> CD62L<sup>hi</sup> central memory cells (T<sub>CM</sub>) in both the CD4<sup>+</sup> and CD8<sup>+</sup> T cell compartments in the blood were assessed. \*p<0.05, \*\*p<0.01.

| Patient | Age | Gender | Weight (kg) | Race      | Hospital LOS* (Days) | ICU LOS* (Days) | SOFA | APACHE | Intubated | Discharge status | Sepsis source | Sepsis Organism                                                                                      |
|---------|-----|--------|-------------|-----------|----------------------|-----------------|------|--------|-----------|------------------|---------------|------------------------------------------------------------------------------------------------------|
| #1      | 19  | F      | 64          | Other     | 7                    | 4               | 8    | 18     | Y         | Home             | Respiratory   | MSSA                                                                                                 |
| #2      | 47  | M      | 70          | Caucasian | 31                   | 8               | 11   | 39     | Y         | Home             | Urine         | Staphylococcus aureus                                                                                |
| #3      | 51  | F      | 65          | Black     | 11                   | 10              | 5    | 14     | Y         | Hospice          | Respiratory   | Escherichia coli, yeast, Staphylococcus aureus, and Coagulase negative Staphylococcus                |
| #4      | 49  | M      | 90          | Black     | 49                   | 25              | 9    | 10     | Y         | Home             | Respiratory   | Klebsiella pneumoniae                                                                                |
| #5      | 33  | M      | 136         | Black     | 11                   | 4               | 8    | 15     | Y         | Rehab            | Blood         | Not identified                                                                                       |
| #6      | 59  | M      | 106         | Black     | 21                   | 2               | 4    | 7      | Y         | Home             | Respiratory   | Staphylococcus aureus, Alpha (Viridans) Streptococcus, Enterobacter aerogenes, Staphylococcus aureus |
| #7      | 46  | M      | 121         | Caucasian | 30                   | 16              | 5    | 14     | Y         | Rehab            | Respiratory   | Acinetobacter calcoaceticus-baumannii complex                                                        |
| #8      | 52  | M      | 91          | Black     | 25                   | 5               | 4    | 25     | Y         | Home             | Respiratory   | Not identified                                                                                       |
| #9      | 56  | M      | 70          | Caucasian | 62                   | 6               | 7    | 28     | Y         | Skilled Nursing  | Blood         | Staphylococcus aureus                                                                                |
| #10     | 38  | F      | 65          | Black     | 27                   | 25              | 8    | 11     | N         | Dead             | Blood         | Not identified                                                                                       |
| #11     | 69  | M      | 45          | Black     | 5                    | 5               | 11   | 40     | Y         | Hospice          | Blood         | Escherichia coli & Serratia marcescens                                                               |
| #12     | 19  | F      | 118         | Other     | 29                   | 7               | 9    | 23     | N         | Home             | Urine         | Not identified                                                                                       |
| #13     | 79  | F      | 71          | Black     | 10                   | 5               | 9    | 21     | Y         | Skilled Nursing  | Respiratory   | Methicillin Resistant Staphylococcus aureus, Streptococcus constellatus                              |
| #14     | 75  | F      | 82          | Black     | 14                   | 5               | 9    | 30     | Y         | Home             | Blood         | Staphylococcus epidermidis, Staphylococcus capitis                                                   |

Supplemental Table I. Human septic patient demographic and clinical characteristics.

\* LOS = Length of stay
